# Supplementary material for: Long-term neural and physiological phenotyping of a single human
Source: PubMed Central journal article supplement (PMC4682164; doi:10.1038/ncomms9885), 2015-12-09
Supplement: ncomms9885-s1.pdf [file ncomms9885-s1.pdf]

**Supplementary Table 1:** Modules identified using WGCNA analysis, with annotation using DAVID for pathways (including Reactome, Panther, KEGG, and BioCarta) and Gene Ontology (GO) terms, and hub genes for each network. P values are FDR-corrected. FE: Fold enrichment value computed using DAVID.

| Mod # | N genes | Pathway                                                                              | P (FDR) | FE  | GO term                                                          | P (FDR) | FE  | Hub genes |
|-------|---------|--------------------------------------------------------------------------------------|---------|-----|------------------------------------------------------------------|---------|-----|-----------|
| 1     | 2025    | HIV Infection (Reactome:6185)                                                        | 0.009   | 1.8 | transcription (GO:0006350)                                       | 0       | 1.5 | TRRAP     |
|       |         | Processing of Capped Intron-Containing Pre-mRNA (Reactome:125)                       | 0.01    | 2.1 | regulation of transcription (GO:0045449)                         | 0       | 1.4 | SEC16A    |
|       |         | Regulation of activated PAK-2p34 by proteasome mediated degradation (Reactome:13635) | 0.01    | 3.1 | chromatin modification (GO:0016568)                              | 0       | 2.1 | CREBBP    |
|       |         | Ubiquitin proteasome pathway (P00060)                                                | 0.011   | 2.5 | regulation of RNA metabolic process (GO:0051252)                 | 0.001   | 1.3 | IGF1R     |
|       |         | Gene Expression (Reactome:71)                                                        | 0.012   | 1.6 | regulation of transcription, DNA-dependent (GO:0006355)          | 0.002   | 1.3 | ARHGAP35  |
|       |         | Signaling by Wnt (Reactome:11045)                                                    | 0.013   | 2.5 | positive regulation of transcription, DNA-dependent (GO:0045893) | 0.002   | 1.6 |           |
|       |         | APC/C (Reactome:9035)                                                                | 0.013   | 2.5 | positive regulation of gene expression (GO:0010628)              | 0.002   | 1.6 |           |
|       |         | Cdc20 (Reactome:6850)                                                                | 0.025   | 2.3 | macromolecule catabolic process (GO:0009057)                     | 0.002   | 1.5 |           |
| 2     | 1364    | Parkinson disease (P00049)                                                           | 0.039   | 2.7 | establishment of protein localization (GO:0045184)               | 0.001   | 1.7 | ARL5A     |
|       |         | Cell Cycle, Mitotic (Reactome:152)                                                   | 0.054   | 1.7 | protein transport (GO:0015031)                                   | 0.001   | 1.7 | COPB1     |
|       |         | Cdc20 (Reactome:6850)                                                                | 0.067   | 2.7 | protein catabolic process (GO:0030163)                           | 0.016   | 1.6 | VBP1      |
|       |         | Signaling by Wnt (Reactome:11045)                                                    | 0.071   | 2.7 | translation (GO:0006412)                                         | 0.017   | 1.9 | STK17A    |
|       |         | DNA Repair (Reactome:216)                                                            | 0.085   | 2.1 | modification-dependent protein catabolic process                 | 0.018   | 1.7 | NDUFB5    |

|   |      |                                                                |       |                                                       |                                                                     |       |                                                  |        |
|---|------|----------------------------------------------------------------|-------|-------------------------------------------------------|---------------------------------------------------------------------|-------|--------------------------------------------------|--------|
|   |      |                                                                |       | (GO:0019941)                                          |                                                                     |       |                                                  |        |
|   |      | Ubiquitin mediated proteolysis (KEGG:hsa04120)                 | 0.093 | 2.3                                                   | modification-dependent macromolecule catabolic process (GO:0043632) | 0.018 | 1.7                                              |        |
|   |      | Oxidative phosphorylation (KEGG:hsa00190)                      | 0.096 | 2.4                                                   | protein localization (GO:0008104)                                   | 0.019 | 1.5                                              |        |
|   |      |                                                                |       | cellular macromolecule catabolic process (GO:0044265) | 0.024                                                               | 1.6   |                                                  |        |
| 3 | 1256 | no pathways enriched                                           |       | lipid biosynthetic process (GO:0008610)               | 0.013                                                               | 2.2   | MAPK8IP3<br>MICAL1<br>SPPL2B<br>SNAPC4<br>UBXN11 |        |
| 4 | 1238 | Spliceosome (KEGG:hsa03040)                                    | 0     | 3.5                                                   | RNA processing (GO:0006396)                                         | 0     | 2.3                                              | EIF2S2 |
|   |      | Gene Expression (Reactome:71)                                  | 0.002 | 1.8                                                   | ribonucleoprotein complex biogenesis (GO:0022613)                   | 0     | 3.4                                              | TAF12  |
|   |      | HIV Infection (Reactome:6185)                                  | 0.002 | 2.2                                                   | mRNA metabolic process (GO:0016071)                                 | 0     | 2.3                                              | TTC1   |
|   |      | Metabolism of non-coding RNA (Reactome:11052)                  | 0.003 | 5.6                                                   | mRNA processing (GO:0006397)                                        | 0     | 2.4                                              | TBCA   |
|   |      | Diabetes pathways (Reactome:15380)                             | 0.017 | 1.7                                                   | RNA splicing (GO:0008380)                                           | 0     | 2.5                                              | PPID   |
|   |      | Huntington's disease (KEGG:hsa05016)                           | 0.024 | 2.2                                                   | ribosome biogenesis (GO:0042254)                                    | 0     | 3.5                                              |        |
|   |      | Processing of Capped Intron-Containing Pre-mRNA (Reactome:125) | 0.026 | 2.2                                                   | ncRNA metabolic process (GO:0034660)                                | 0     | 2.7                                              |        |
|   |      | Cell Cycle, Mitotic (Reactome:152)                             | 0.035 | 1.6                                                   | protein folding (GO:0006457)                                        | 0     | 2.9                                              |        |

|   |      |                                                          |                                                    |       |                                                                        |       |     |         |
|---|------|----------------------------------------------------------|----------------------------------------------------|-------|------------------------------------------------------------------------|-------|-----|---------|
| 5 | 1128 | Hemostasis<br>(Reactome:604)                             | 0                                                  | 2.8   | coagulation<br>(GO:0050817)                                            | 0.001 | 3.8 | PRKG1   |
|   |      | Gap junction<br>(KEGG:hsa04540)                          | 0                                                  | 3.7   | blood coagulation<br>(GO:0007596)                                      | 0.001 | 3.8 | IGF2BP3 |
|   |      | Vascular smooth<br>muscle contraction<br>(KEGG:hsa04270) | 0.01                                               | 2.8   | hemostasis<br>(GO:0007599)                                             | 0.002 | 3.8 | PROS1   |
|   |      | Endocytosis<br>(KEGG:hsa04144)                           | 0.037                                              | 2.1   | enzyme linked<br>receptor protein<br>signaling pathway<br>(GO:0007167) | 0.002 | 2.2 | SLFN14  |
|   |      | Blood coagulation<br>(P00011)                            | 0.073                                              | 3.3   | response to<br>hormone stimulus<br>(GO:0009725)                        | 0.002 | 2.2 | ABCC4   |
|   |      | Focal adhesion<br>(KEGG:hsa04510)                        | 0.091                                              | 2     | protein amino acid<br>phosphorylation<br>(GO:0006468)                  | 0.003 | 1.8 |         |
|   |      |                                                          |                                                    |       | wound healing<br>(GO:0042060)                                          | 0.003 | 2.7 |         |
|   |      |                                                          | intracellular<br>signaling cascade<br>(GO:0007242) | 0.003 | 1.6                                                                    |       |     |         |
| 6 | 923  | no pathways<br>enriched                                  |                                                    |       | RNA processing<br>(GO:0006396)                                         | 0.001 | 2.2 | ACADVL  |
|   |      |                                                          |                                                    |       | RNA splicing<br>(GO:0008380)                                           | 0.006 | 2.6 | DHX38   |
|   |      |                                                          |                                                    |       | mRNA processing<br>(GO:0006397)                                        | 0.074 | 2.2 | MIR3916 |
|   |      |                                                          |                                                    |       | mRNA metabolic<br>process<br>(GO:0016071)                              | 0.09  | 2.1 | TPM3P9  |
|   |      |                                                          |                                                    |       |                                                                        |       |     |         |
| 7 | 810  | no pathways<br>enriched                                  |                                                    |       | transcription<br>(GO:0006350)                                          | 0     | 1.6 | RICTOR  |
|   |      |                                                          |                                                    |       | regulation of<br>transcription<br>(GO:0045449)                         | 0     | 1.5 | TRIM33  |

|                                                                        |       |     |        |
|------------------------------------------------------------------------|-------|-----|--------|
| protein catabolic process<br>(GO:0030163)                              | 0.006 | 2   | UBR2   |
| regulation of RNA metabolic process<br>(GO:0051252)                    | 0.008 | 1.5 | DMXL1  |
| modification-dependent protein catabolic process<br>(GO:0019941)       | 0.017 | 1.9 | ZNF121 |
| modification-dependent macromolecule catabolic process<br>(GO:0043632) | 0.017 | 1.9 |        |
| regulation of transcription, DNA-dependent<br>(GO:0006355)             | 0.019 | 1.5 |        |
| cellular protein catabolic process<br>(GO:0044257)                     | 0.02  | 1.9 |        |

---

|   |     |                      |                      |  |         |
|---|-----|----------------------|----------------------|--|---------|
| 8 | 623 | no pathways enriched | no GO terms enriched |  | HNRNPH1 |
|   |     |                      |                      |  | PDXDC2P |
|   |     |                      |                      |  | ENTPD4  |
|   |     |                      |                      |  | ARMCX4  |
|   |     |                      |                      |  | SREK1   |

---

|   |     |                      |                      |  |        |
|---|-----|----------------------|----------------------|--|--------|
| 9 | 586 | no pathways enriched | no GO terms enriched |  | LMAN2  |
|   |     |                      |                      |  | NDUFB7 |
|   |     |                      |                      |  | GSTP1  |
|   |     |                      |                      |  | AAMP   |
|   |     |                      |                      |  | TESC   |

---

|    |     |                      |                                                              |       |     |        |
|----|-----|----------------------|--------------------------------------------------------------|-------|-----|--------|
| 10 | 485 | no pathways enriched | positive regulation of cell death<br>(GO:0010942)            | 0.032 | 2.5 | IFNAR1 |
|    |     |                      | positive regulation of programmed cell death<br>(GO:0043068) | 0.039 | 2.5 | EVI2B  |
|    |     |                      | cellular response to extracellular stimulus<br>(GO:0031668)  | 0.041 | 6.1 | ZNF217 |

response to organic 0.042 2.2 KCTD12  
 substance  
 (GO:0010033)  
 positive regulation 0.053 2.5 NBR1  
 of apoptosis  
 (GO:0043065)

---

|    |     |                                                                     |       |     |                                                          |       |      |                                |
|----|-----|---------------------------------------------------------------------|-------|-----|----------------------------------------------------------|-------|------|--------------------------------|
| 11 | 433 | Valine, leucine and<br>isoleucine<br>degradation<br>(KEGG:hsa00280) | 0.007 | 7.8 | deoxyribonucleotide<br>catabolic process<br>(GO:0009264) | 0.018 | 18.5 | RNH1                           |
|    |     |                                                                     |       |     |                                                          |       |      | CYBA<br>MBD3<br>SSBP4<br>SIPA1 |

---

|    |     |                                              |       |     |                         |  |  |                       |
|----|-----|----------------------------------------------|-------|-----|-------------------------|--|--|-----------------------|
| 12 | 425 | mTOR signaling<br>pathway<br>(KEGG:hsa04150) | 0.014 | 7   | no GO terms<br>enriched |  |  | INTS1                 |
|    |     | Transcription<br>(Reactome:1788)             | 0.026 | 4.1 |                         |  |  | MYBBP1A               |
|    |     |                                              |       |     |                         |  |  | ULK1<br>CLCN7<br>PKD1 |

---

|    |     |                                       |       |     |                                                |   |      |                                          |
|----|-----|---------------------------------------|-------|-----|------------------------------------------------|---|------|------------------------------------------|
| 13 | 405 | Taste transduction<br>(KEGG:hsa04742) | 0.001 | 9.9 | sensory perception<br>of taste<br>(GO:0050909) | 0 | 13.2 | TTN                                      |
|    |     |                                       |       |     |                                                |   |      | LOC100132247<br>PKD2L2<br>TENM1<br>MYH10 |

|    |     |                                                              |       |     |                                  |       |     |                                                   |
|----|-----|--------------------------------------------------------------|-------|-----|----------------------------------|-------|-----|---------------------------------------------------|
| 14 | 364 | Signaling in Immune system<br>(Reactome:6900)                | 0.006 | 2.8 | immune response<br>(GO:0006955)  | 0     | 2.7 | ATP6V0D1                                          |
|    |     | Natural killer cell mediated cytotoxicity<br>(KEGG:hsa04650) | 0.069 | 3.3 | defense response<br>(GO:0006952) | 0.009 | 2.4 | TMEM176B                                          |
|    |     | Leukocyte transendothelial migration<br>(KEGG:hsa04670)      | 0.075 | 3.7 |                                  |       |     | IL17RA                                            |
|    |     | Pathways in cancer<br>(KEGG:hsa05200)                        | 0.078 | 2.3 |                                  |       |     | TMEM176A                                          |
|    |     | Axon guidance<br>(KEGG:hsa04360)                             | 0.093 | 3.4 |                                  |       |     | NUP62                                             |
| 15 | 187 | no pathways enriched                                         |       |     | no GO terms enriched             |       |     | ZDHHC17<br><br>DNAJB14<br>DHX15<br>FAM76B<br>MIOS |
| 16 | 166 | no pathways enriched                                         |       |     | no GO terms enriched             |       |     | ERGIC1<br><br>CFL1<br>PIGS<br>PPP1R11<br>NMT1     |
| 17 | 133 | no pathways enriched                                         |       |     | no GO terms enriched             |       |     | CPVL<br><br>HNMT<br>CD86<br>ACSL4<br>NLRC4        |
| 18 | 130 | Integrin signalling pathway (P00034)                         | 0.068 | 4   | no GO terms enriched             |       |     | ACTN1                                             |

MPL  
PEAR1  
CMIP  
ANKRD33B

|    |     |                                    |   |                                                         |                      |     |          |
|----|-----|------------------------------------|---|---------------------------------------------------------|----------------------|-----|----------|
| 19 | 127 | no pathways enriched               |   | transcription (GO:0006350)                              | 0                    | 3.3 | SMARCAD1 |
|    |     |                                    |   | regulation of transcription (GO:0045449)                | 0                    | 2.9 | ZNF441   |
|    |     |                                    |   | regulation of RNA metabolic process (GO:0051252)        | 0                    | 3.4 | ZBTB41   |
|    |     |                                    |   | regulation of transcription, DNA-dependent (GO:0006355) | 0                    | 3.4 | GOPC     |
|    |     |                                    |   |                                                         |                      |     | ZNF33B   |
| 20 | 104 | no pathways enriched               |   | no GO terms enriched                                    |                      |     | TRIQQ    |
|    |     |                                    |   |                                                         |                      |     | ITFG1    |
|    |     |                                    |   |                                                         |                      |     | HIPK3    |
|    |     |                                    |   |                                                         |                      |     | BNIP3L   |
|    |     |                                    |   |                                                         |                      |     | RMND5A   |
| 21 | 101 | Cell Cycle, Mitotic (Reactome:152) | 0 | 6.1                                                     | no GO terms enriched |     | CNTRL    |
|    |     |                                    |   |                                                         |                      |     | TPR      |
|    |     |                                    |   |                                                         |                      |     | AKAP9    |
|    |     |                                    |   |                                                         |                      |     | PCM1     |
|    |     |                                    |   |                                                         |                      |     | PHF3     |
| 22 | 85  | no pathways enriched               |   | chromosome organization (GO:0051276)                    | 0                    | 6.9 | SMARCC2  |

|                                     |       |     |        |
|-------------------------------------|-------|-----|--------|
| chromatin organization (GO:0006325) | 0.001 | 6.9 | YLPM1  |
| chromatin modification (GO:0016568) | 0.016 | 6.9 | RBBP6  |
| mRNA metabolic process (GO:0016071) | 0.073 | 5.1 | BRPF3  |
| RNA splicing (GO:0008380)           | 0.081 | 5.8 | MAP4K4 |

|    |    |                      |                      |                                                     |
|----|----|----------------------|----------------------|-----------------------------------------------------|
| 23 | 72 | no pathways enriched | no GO terms enriched | SNORA50<br>SCARNA3<br>SNORA64<br>SNORA20<br>SNORA18 |
| 24 | 56 | no pathways enriched | no GO terms enriched | NCOA1<br>NCOR1<br>BPTF<br>ANKRD17<br>TAB2           |
| 25 | 54 | no pathways enriched | no GO terms enriched | LYST<br>DMXL2<br>LRRK2<br>CREB5<br>PTPRE            |
| 26 | 48 | no pathways enriched | no GO terms enriched | EFCAB14<br>ZBTB2<br>ATMIN<br>SSR1<br>ATF6           |
| 27 | 35 | no pathways          | response to virus    | 0.001 27.6 IFIT3                                    |

|    |    |                                              |       |                      |                                                |       |      |                                          |
|----|----|----------------------------------------------|-------|----------------------|------------------------------------------------|-------|------|------------------------------------------|
|    |    | enriched                                     |       | (GO:0009615)         |                                                |       |      | IFIT1<br>IFIT2<br>LAP3<br>RSAD2          |
| 28 | 30 | no pathways enriched                         |       | no GO terms enriched |                                                |       |      | SKAP2<br><br>TLR5<br>RALB<br>DSE<br>CD36 |
| 29 | 28 | Telomere Maintenance (Reactome:7970)         | 0     | 48.5                 | nucleosome organization (GO:0034728)           | 0.003 | 36.4 | HIST1H4H                                 |
|    |    | Systemic lupus erythematosus (KEGG:hsa05322) | 0     | 41.1                 | protein-DNA complex assembly (GO:0065004)      | 0.003 | 37.2 | HIST1H3D                                 |
|    |    |                                              |       |                      | DNA packaging (GO:0006323)                     | 0.004 | 28.9 | MEMO1                                    |
|    |    |                                              |       |                      | chromatin assembly (GO:0031497)                | 0.004 | 38.9 | HIST1H4A                                 |
|    |    |                                              |       |                      | chromatin assembly or disassembly (GO:0006333) | 0.005 | 26.6 | C6orf48                                  |
|    |    |                                              |       |                      | chromatin organization (GO:0006325)            | 0.007 | 11.2 |                                          |
|    |    |                                              |       |                      | nucleosome assembly (GO:0006334)               | 0.008 | 40.3 |                                          |
|    |    |                                              |       |                      | chromosome organization (GO:0051276)           | 0.016 | 8.7  |                                          |
| 30 | 27 | IL 5 Signaling Pathway (h_il5Pathway)        | 0.008 | 71.8                 | no GO terms enriched                           |       |      | CLC                                      |
|    |    | Asthma (KEGG:hsa05310)                       | 0.084 | 37.6                 |                                                |       |      | CCR3<br><br>IL5RA<br>MS4A3<br>MS4A2      |

|    |    |                                                                |       |      |                                             |       |       |                                               |
|----|----|----------------------------------------------------------------|-------|------|---------------------------------------------|-------|-------|-----------------------------------------------|
| 31 | 26 | no pathways enriched                                           |       |      | no GO terms enriched                        |       |       | PION<br>TMEM181<br>ATP8A1<br>GOLT1B<br>ANKAR  |
| 32 | 25 | no pathways enriched                                           |       |      | no GO terms enriched                        |       |       | CSF3R<br>PRAM1<br>INPPL1<br>RUSC2<br>ADAMTSL4 |
| 33 | 21 | Natural killer cell mediated cytotoxicity (KEGG:hsa04650)      | 0     | 19.1 | natural killer cell activation (GO:0030101) | 0.071 | 113.7 | PDGFRB                                        |
|    |    | Graft-versus-host disease (KEGG:hsa05332)                      | 0.001 | 43.5 |                                             |       |       | FCRL6                                         |
|    |    | Antigen processing and presentation (KEGG:hsa04612)            | 0.006 | 20.4 |                                             |       |       | YPEL1                                         |
|    |    | Signaling in Immune system (Reactome:6900)                     | 0.015 | 7.9  |                                             |       |       | KIR3DL1<br>KIR2DL1                            |
| 34 | 19 | Processing of Capped Intron-Containing Pre-mRNA (Reactome:125) | 0.001 | 24.7 | RNA splicing (GO:0008380)                   | 0     | 22.2  | NCL                                           |
|    |    | Influenza Infection (Reactome:6167)                            | 0.001 | 17.3 | mRNA processing (GO:0006397)                | 0     | 19.7  | HNRNPM                                        |
|    |    | Gene Expression (Reactome:71)                                  | 0.005 | 7.8  | mRNA metabolic process (GO:0016071)         | 0     | 17.1  | HNRNPA0                                       |
|    |    | Spliceosome (KEGG:hsa03040)                                    | 0.058 | 17.3 | RNA processing (GO:0006396)                 | 0     | 11.5  | STRAP                                         |

|                                                                                                   |       |      |       |
|---------------------------------------------------------------------------------------------------|-------|------|-------|
| nuclear mRNA splicing, via spliceosome (GO:0000398)                                               | 0.008 | 23.6 | PDCD4 |
| RNA splicing, via transesterification reactions (GO:0000375)                                      | 0.008 | 23.6 |       |
| RNA splicing, via transesterification reactions with bulged adenosine as nucleophile (GO:0000377) | 0.008 | 23.6 |       |

---

|    |    |                                            |       |      |                                               |       |       |         |
|----|----|--------------------------------------------|-------|------|-----------------------------------------------|-------|-------|---------|
| 35 | 18 | Signaling in Immune system (Reactome:6900) | 0.043 | 11.9 | response to bacterium (GO:0009617)            | 0     | 35    | LTF     |
|    |    | Hemostasis (Reactome:604)                  | 0.069 | 14.5 | defense response to bacterium (GO:0042742)    | 0     | 52.8  | OLFM4   |
|    |    |                                            |       |      | defense response (GO:0006952)                 | 0     | 13.7  | CRISP3  |
|    |    |                                            |       |      | immune response (GO:0006955)                  | 0     | 9.8   | CEACAM8 |
|    |    |                                            |       |      | aminoglycan catabolic process (GO:0006026)    | 0.006 | 120.8 | BPI     |
|    |    |                                            |       |      | polysaccharide catabolic process (GO:0000272) | 0.008 | 90.6  |         |
|    |    |                                            |       |      | aminoglycan metabolic process (GO:0006022)    | 0.039 | 39    |         |
|    |    |                                            |       |      | polysaccharide metabolic process (GO:0005976) | 0.084 | 22.9  |         |

---

|    |    |                      |  |  |                      |  |  |          |
|----|----|----------------------|--|--|----------------------|--|--|----------|
| 36 | 16 | no pathways enriched |  |  | no GO terms enriched |  |  | SNORA74A |
|    |    |                      |  |  |                      |  |  | SNORA45  |
|    |    |                      |  |  |                      |  |  | SNORA53  |
|    |    |                      |  |  |                      |  |  | SNORA77  |
|    |    |                      |  |  |                      |  |  | SCARNA11 |

|    |    |                                               |       |      |                      |                                                 |
|----|----|-----------------------------------------------|-------|------|----------------------|-------------------------------------------------|
| 37 | 13 | Signaling in Immune system<br>(Reactome:6900) | 0.084 | 11.9 | no GO terms enriched | KLRD1<br><br>SH2D1B<br>CCL4<br>PRSS23<br>NADKD1 |
| 38 | 12 | no pathways enriched                          |       |      | no GO terms enriched | CD33<br><br>FKBP15<br>OSCAR<br>GAB2<br>ARRB2    |

**Supplementary Table 2.** Clusters of compounds identified using affinity propagation clustering on metabolomics data, with pathway enrichment identified using IMPALA.

| Cluster # | Compounds                                                                                                                                                                      | Pathways                                                   | FDR   |
|-----------|--------------------------------------------------------------------------------------------------------------------------------------------------------------------------------|------------------------------------------------------------|-------|
| 1         | tocopherol gamma-, tocopherol alpha-, threitol, shikimic acid, pyrophosphate, malic acid, isothreonic acid, indole-3-acetate, fumaric acid, cholesterol, 2-ketoisocaproic acid | no enrichment                                              |       |
| 2         | trans-4-hydroxyproline, threonine, serine, oxoproline, myo-inositol, hexitol, glycine, citric acid, aminomalonnate, alanine                                                    | Glycerophospholipid Biosynthetic Pathway (Wikipathways)    | 0     |
|           |                                                                                                                                                                                | Glycerophospholipid Biosynthetic Pathway (Wikipathways)    | 0     |
|           |                                                                                                                                                                                | gamma-glutamyl cycle (HumanCyc)                            | 0     |
| 3         | parabanic acid, oxalic acid, nicotinic acid, glycolic acid, alloxanoic acid, 2,4-diaminobutyric acid, 2,3-dihydroxypyridine                                                    | no enrichment                                              |       |
| 4         | sucrose, ornithine, lysine, histidine                                                                                                                                          | ABC transporters - Homo sapiens (KEGG)                     | 0.001 |
|           |                                                                                                                                                                                | Glucose Homeostasis (Wikipathways)                         | 0.001 |
|           |                                                                                                                                                                                | Amino acid transport across the plasma membrane (Reactome) | 0.003 |
| 5         | palmitoleic acid, oleic acid, linoleic acid, capric acid, arachidonic acid                                                                                                     | triacylglycerol degradation (HumanCyc)                     | 0     |
|           |                                                                                                                                                                                | Sphingomyelin metabolism/ ceramide salvage (HumanCyc)      | 0     |
|           |                                                                                                                                                                                | phospholipases (HumanCyc)                                  | 0     |
| 6         | urea, phosphate, methionine sulfoxide, hexuronic acid                                                                                                                          | no enrichment                                              |       |

|    |                                                                                                                                                                                   |                                                                                                                |       |
|----|-----------------------------------------------------------------------------------------------------------------------------------------------------------------------------------|----------------------------------------------------------------------------------------------------------------|-------|
| 7  | tyrosine, mannose, lactic acid, glucose, 1,5-anhydroglucitol                                                                                                                      | no enrichment                                                                                                  |       |
| 8  | valine, pseudo uridine, N-methylalanine, N-acetylornithine, methionine, leucine, isoleucine, indole-3-lactate, hippuric acid, glyceric acid, glutamic acid, 2-hydroxyvaleric acid | Endosomal/Vacuolar pathway (Reactome)                                                                          | 0     |
|    |                                                                                                                                                                                   | Proton/oligonucleotide cotransporters (Reactome)                                                               | 0     |
|    |                                                                                                                                                                                   | Aminoacyl-tRNA biosynthesis - Homo sapiens (KEGG)                                                              | 0     |
| 9  | stearic acid, palmitic acid, myristic acid, isoheptadecanoic acid, heptadecanoic acid, beta-alanine                                                                               | Transport of fatty acids (Reactome)                                                                            | 0     |
|    |                                                                                                                                                                                   | Fatty acid biosynthesis - Homo sapiens (KEGG)                                                                  | 0     |
|    |                                                                                                                                                                                   | Free fatty acid receptors (Reactome)                                                                           | 0.001 |
| 10 | phenylalanine, lyxitol, hexonic acid, glycerol, ethanolamine, erythritol, butane-2,3-diol, 2-deoxytetronic acid, 2-deoxyerythritol                                                | Glycerophospholipid Biosynthetic Pathway (Wikipathways)                                                        | 0.018 |
|    |                                                                                                                                                                                   | Glycerophospholipid Biosynthetic Pathway (Wikipathways)                                                        | 0.034 |
|    |                                                                                                                                                                                   | Glycerophospholipid Biosynthetic Pathway (Wikipathways)                                                        | 0.095 |
| 11 | tryptophan, taurine, proline, phenylethylamine, glutamine, creatinine, asparagine                                                                                                 | Na <sup>+</sup> /Cl <sup>-</sup> dependent neurotransmitter transporters (Reactome)                            | 0     |
|    |                                                                                                                                                                                   | Transport of glucose and other sugars, bile salts and organic acids, metal ions and amine compounds (Reactome) | 0     |
|    |                                                                                                                                                                                   | Amino acid transport across the plasma membrane (Reactome)                                                     | 0     |

|    |                                                                                                                                                                                                         |                                                                                                       |                         |
|----|---------------------------------------------------------------------------------------------------------------------------------------------------------------------------------------------------------|-------------------------------------------------------------------------------------------------------|-------------------------|
| 12 | xylulose, xylose, uridine, pelargonic acid, p-cresol, N-acetylmannosamine, methanolphosphate, lauric acid, hydroxylamine, hydroxycarbamate, glycerol-alpha-phosphate, dehydroabietic acid, benzoic acid | no enrichment                                                                                         |                         |
| 13 | behenic acid, arachidic acid                                                                                                                                                                            | retinol biosynthesis (HumanCyc)<br>fatty acid activation (HumanCyc)<br>acyl-CoA hydrolysis (HumanCyc) | 0.064<br>0.064<br>0.064 |
| 14 | uric acid, threonic acid, succinic acid, fructose, cystine, acetoacetate                                                                                                                                | no enrichment                                                                                         |                         |
| 15 | N-acetylglycine, isocitric acid, 3-hydroxybutyric acid, 3-hydroxybutanoic acid, 2-hydroxybutanoic acid                                                                                                  | no enrichment                                                                                         |                         |

## Supplementary Note 1: Survey Questions

### 1.1 Morning survey:

Question: Sleep quality

Answers: 1. Extremely poor, 2. Very poor, 3. Poor, 4. Average, 5. Good, 6. Very good, 7. Extremely good

Question: Soreness

Answers: 1. Extremely sore, 2. Very sore, 3. Sore, 4. Average, 5. Good, 6. Very good, 7. Extremely good

Question: Blood pressure

Answers: (free text)

Question: Pulse

Answers: (free text)

### 1.2 PANAS-X (administered after each scan)

For all questions, answers were:

1. Very slightly or not at all, 2. A little, 3. Moderately, 4. Quite a bit, 5. Extremely afraid, scared, nervous, jittery, irritable, hostile, guilty, ashamed, upset, distressed, active, alert, attentive, determined, enthusiastic, excited, inspired, interested, proud, strong, cheerful, disgusted, attentive, bashful, sluggish, daring, surprised, strong, scornful, relaxed, irritable, delighted, inspired, fearless, disgusted with self, sad, calm, afraid, tired, amazed, shaky, happy, timid, alone, alert, upset, angry, bold, blue, shy, active, guilty, joyful, nervous, lonely, sleepy, excited, hostile, proud, jittery, lively, ashamed, at ease, scared, drowsy, angry at self, enthusiastic, downhearted, sheepish, distressed, blameworthy, determined, frightened, astonished, interested, loathing, confident, energetic, concentrating, dissatisfied with self

### 1.3 Post-scan survey

Question: Anxiety during scan

Answers: 1. Extremely anxious, 2. Very anxious, 3. Anxious, 4. Average, 5. Good, 6. Very good, 7. Extremely good

Question: Blood pressure

Answers: (free text)

Question: Thoughts during scan

Answers: (free text)

### 1.4 Evening survey

Question: Time spent outdoors (hours)

Answers: (free text)

Question: Psoriasis severity

Answers: 1. Extremely bad, 2. Very bad, 3. Bad, 4. Average, 5. Good, 6. Very good, 7. Extremely good

Question: Stress

Answers: 1. Extremely bad, 2. Very bad, 3. Bad, 4. Average, 5. Good, 6. Very good, 7. Extremely good

Question: Gut health

Answers: 1. Extremely bad, 2. Very bad, 3. Bad, 4. Average, 5. Good, 6. Very good, 7. Extremely good

Question: End of day report

Answers: (free text)

Question: Exercise (describe, leave blank for none)

Answers: (free text)

Question: Alcohol (standard drinks consumed)  
Answers: (free text)

Question: Food (describe all ingredients eaten)  
Answers: (free text)
